# Supplementary material
Source: Royal Society of Chemistry journal article supplement (doi:10.1039/d5cp04316f)
Supplement: d5cp04316f1.pdf [file d5cp04316f1.pdf]

## Supplementary

### **A Two-Stage Model of Verwey Transition in Fe<sub>3</sub>O<sub>4</sub>: First-Principles Studies**

Huijian Li<sup>1</sup>, Xiong Yang<sup>1</sup>, Chenxi Hu<sup>1</sup>, Mingrun Du<sup>1</sup>, Bin Zhang<sup>1</sup>, Liying Wang<sup>2</sup>,  
Xiang Liu<sup>1,\*</sup>

*<sup>1</sup>College of Science, Civil Aviation University of China, Tianjin 300300, China*

*<sup>2</sup>Tianjin Key Laboratory of Low Dimensional Materials Physics and Preparation  
Technology, School of Science, Tianjin University, Tianjin 300354, China*

---

\*Author to whom correspondence should be addressed

Email: liu\_x@cauc.edu.cn

## **Section I. Convergence test with respect to $k$ -point mesh**

As shown in the Fig. S1, the total energy of fully distorted  $\text{Fe}_3\text{O}_4$  unit cell with  $k$ -point mesh of  $2 \times 2 \times 2$ ,  $3 \times 3 \times 3$ , and  $5 \times 5 \times 5$  is tested. The total energies of  $\text{Fe}_3\text{O}_4$  converge to  $-1557.7849619$  eV and  $-1557.7849430$  eV by using a  $3 \times 3 \times 3$  and  $5 \times 5 \times 5$  meshes, respectively. The energy difference between these two settings is only  $1.89 \times 10^{-5}$  eV/u.c. ( $\sim 8.42 \times 10^{-8}$  eV/atom). Thus, a  $3 \times 3 \times 3$   $k$ -point mesh is sufficient for the  $\text{Fe}_3\text{O}_4$  system.

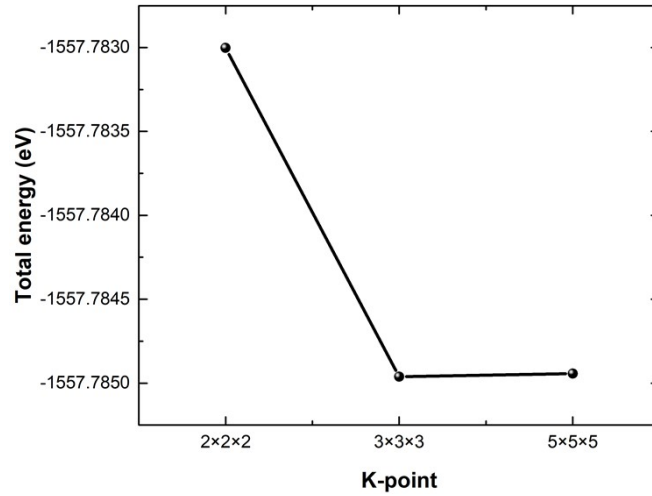

Fig. S1 The convergent total energy of fully distorted  $\text{Fe}_3\text{O}_4$  with different  $k$ -point mesh.

## Section II. Convergence test with respect to Hubbard $U$

As shown in Fig S2 to S4, the variations in total energy, band gap, charge, and magnetic moment for distortion levels of 10%, 20%, and 30% with Hubbard  $U$  parameter of 3, 3.5, 4, 4.5, 5, and 5.5 eV are calculated. Here, a uniform  $J=0.89$  eV is introduced as mentioned in manuscript.

As shown in Fig. S2(a), the total energy with different  $U$  shows a similar trend as the distortion increases. For a given distortion level, the total energy increases with the increasing  $U$ , which is expected due to the enhancement of electron-electron repulsion introduced by  $U$ .

Figure S2(b) shows the dependence of band gap on the Hubbard  $U$ . The band gap increases with the increased  $U$ , which is in line with the previous results.<sup>1</sup> For  $U=3$ , the electron-electron interaction is too weak to open a band gap even the distortion reaches to 30%. For  $U=3.5$  and 4 eV, the band gap gradually widens as the distortion increased. For  $U=4.5, 5$  and 5.5 eV, the band gap increases with lattice distortion (e.g., at  $d=10\%$ , 30%, and 100%), but exhibits a local minimum at  $d=20\%$ .

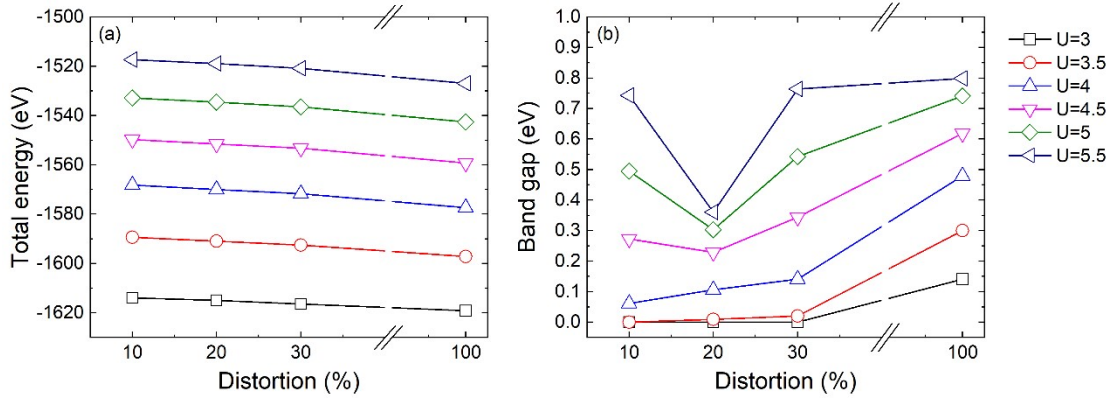

Fig. S2 The dependence of (a) total energy and (b) band gap on Hubbard  $U$ .

The charge ordering with different settings of  $U$  is examined. As shown in Fig. S3, clearly charge ordering can be observed for all cases except  $U=4$  eV. However, an unexpected reversal of occurs between low and high  $U$  regimes. At  $U=3$  and 3.5 eV, the Fe ions that exhibit divalent-like character at higher  $U$  (e.g., 4.5–5.5 eV) instead appear trivalent, and vice versa. The results obtained with smaller  $U$  show significant discrepancies compared to the experimental results as reported by Senn *et al.*<sup>2</sup> Consequently, we conclude that a small Hubbard  $U$  value is insufficient to reproduce the correct electronic structure of  $\text{Fe}_3\text{O}_4$ . In contrast, the results obtained with larger value, i.e.,  $U=5$  and 5.5 eV show similar trend compared to results with  $U=4.5$  eV supporting the robustness of our findings. Although the charge separation gets larger with higher value of  $U$ , it is reasonable due to the increased electron-electron repulsion introduced by  $U$  as well.

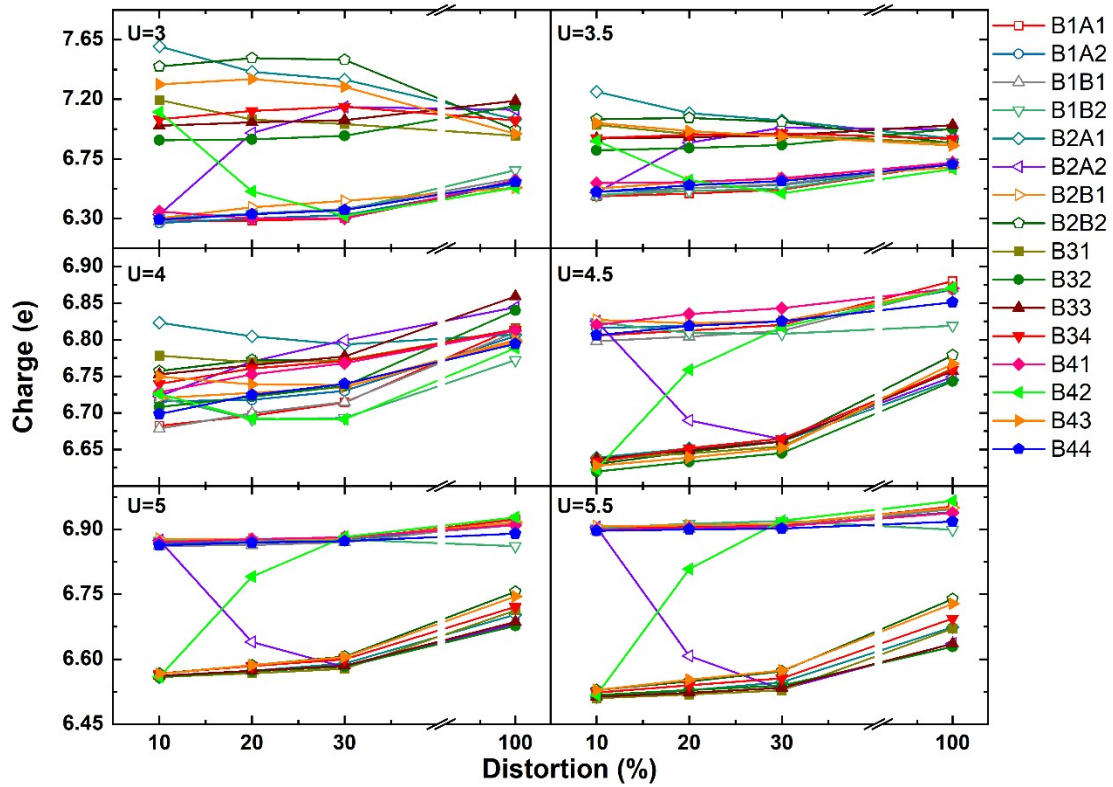

Fig. S3 The dependence of charge at  $\text{Fe}_B$  sites on distortion and Hubbard  $U$ .

Figure S4 shows the magnetic moment results with different settings of  $U$ . The magnetic moments show strongly dependence on the Hubbard  $U$  when the value is less than 4.5 eV. In contrast, the magnetic moments show similar dependence on the distortion when  $U$  is larger than 4.5 eV, which suppose that the utilize of GGA+ $U$  method with  $U=4.5$  eV is reasonable to investigate the electronic structures of  $\text{Fe}_3\text{O}_4$ .

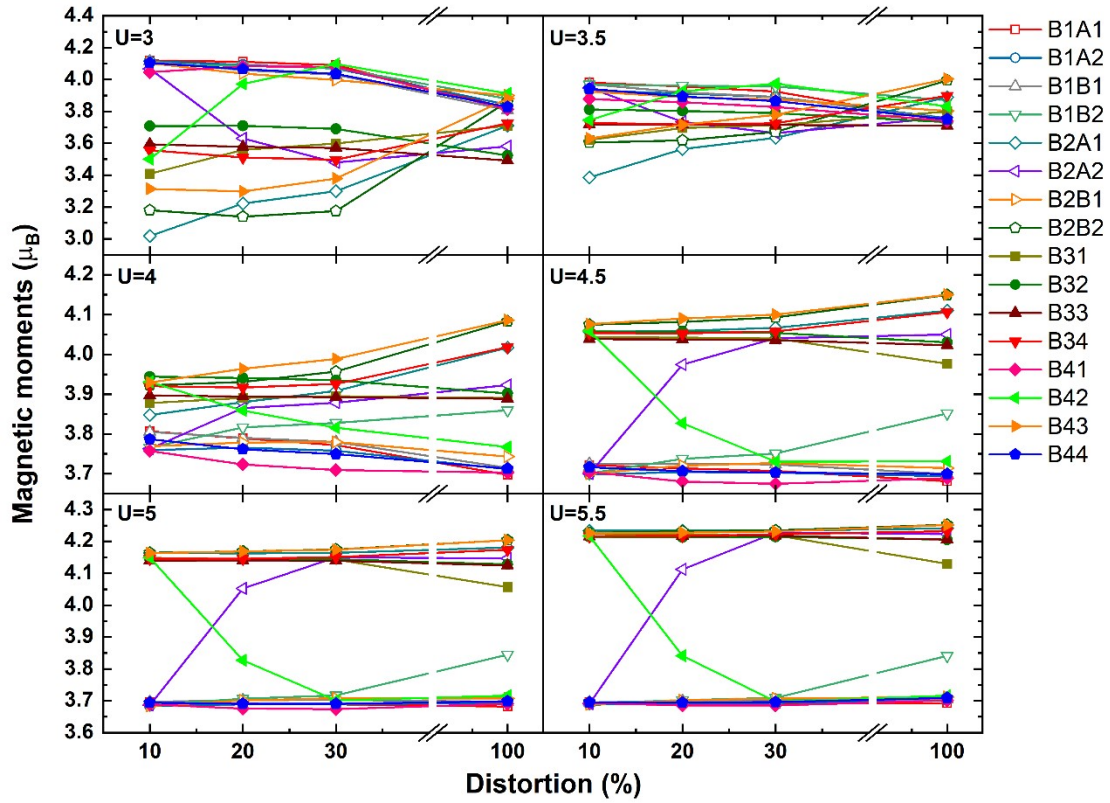

Fig. S4 The dependence of magnetic moments at  $\text{Fe}_B$  sites on distortion and Hubbard  $U$ .

### **Section III. The final geometries of the unit cells used in this work. The lattice**

**constants are in VASP format.**

Fe<sub>3</sub>O<sub>4</sub> *d*=0%

Lattice constants:

|                     |                    |                     |
|---------------------|--------------------|---------------------|
| 8.3960000000000000  | 8.3960000000000000 | 0.0000000000000000  |
| -8.3960000000000000 | 8.3960000000000000 | 0.0000000000000000  |
| 0.0000000000000000  | 0.0000000000000000 | 16.7920000000000000 |

Fractional coordinates:

| site | x        | y        | z        | site   | x        | y        | z        |
|------|----------|----------|----------|--------|----------|----------|----------|
| O1   | 0.875000 | 0.875000 | 0.000000 | O6B1   | 0.000000 | 0.000000 | 0.625000 |
| O12  | 0.875000 | 0.375000 | 0.000000 | O6B2   | 0.000000 | 0.500000 | 0.625000 |
| O13  | 0.625000 | 0.875000 | 0.500000 | O6B3   | 0.000000 | 0.000000 | 0.875000 |
| O14  | 0.625000 | 0.375000 | 0.500000 | O6B4   | 0.000000 | 0.500000 | 0.875000 |
| O21  | 0.875000 | 0.625000 | 0.000000 | FeA11  | 0.875000 | 0.750000 | 0.062500 |
| O22  | 0.875000 | 0.125000 | 0.000000 | FeA12  | 0.875000 | 0.250000 | 0.062500 |
| O23  | 0.625000 | 0.625000 | 0.500000 | FeA13  | 0.625000 | 0.750000 | 0.437500 |
| O24  | 0.625000 | 0.125000 | 0.500000 | FeA14  | 0.625000 | 0.250000 | 0.437500 |
| O31  | 0.875000 | 0.875000 | 0.250000 | FeA21  | 0.875000 | 0.500000 | 0.187500 |
| O32  | 0.875000 | 0.375000 | 0.250000 | FeA22  | 0.875000 | 0.000000 | 0.187500 |
| O33  | 0.625000 | 0.875000 | 0.250000 | FeA23  | 0.625000 | 0.500000 | 0.312500 |
| O34  | 0.625000 | 0.375000 | 0.250000 | FeA24  | 0.625000 | 0.000000 | 0.312500 |
| O41  | 0.875000 | 0.625000 | 0.250000 | FeB1A1 | 0.750000 | 0.000000 | 0.000000 |
| O42  | 0.875000 | 0.125000 | 0.250000 | FeB1A2 | 0.750000 | 0.500000 | 0.000000 |
| O43  | 0.625000 | 0.625000 | 0.250000 | FeB1B1 | 0.000000 | 0.500000 | 0.500000 |
| O44  | 0.625000 | 0.125000 | 0.250000 | FeB1B2 | 0.000000 | 0.000000 | 0.500000 |
| O5A1 | 0.750000 | 0.750000 | 0.125000 | FeB2A1 | 0.750000 | 0.750000 | 0.250000 |
| O5A2 | 0.750000 | 0.250000 | 0.125000 | FeB2A2 | 0.750000 | 0.250000 | 0.250000 |
| O5A3 | 0.750000 | 0.750000 | 0.375000 | FeB2B1 | 0.000000 | 0.750000 | 0.750000 |
| O5A4 | 0.750000 | 0.250000 | 0.375000 | FeB2B2 | 0.000000 | 0.250000 | 0.750000 |
| O5B1 | 0.000000 | 0.750000 | 0.625000 | FeB31  | 0.875000 | 0.875000 | 0.375000 |
| O5B2 | 0.000000 | 0.250000 | 0.625000 | FeB32  | 0.875000 | 0.375000 | 0.375000 |
| O5B3 | 0.000000 | 0.750000 | 0.875000 | FeB33  | 0.625000 | 0.875000 | 0.125000 |
| O5B4 | 0.000000 | 0.250000 | 0.875000 | FeB34  | 0.625000 | 0.375000 | 0.125000 |
| O6A1 | 0.750000 | 0.500000 | 0.125000 | FeB41  | 0.875000 | 0.625000 | 0.375000 |
| O6A2 | 0.750000 | 0.000000 | 0.125000 | FeB42  | 0.875000 | 0.125000 | 0.375000 |
| O6A3 | 0.750000 | 0.500000 | 0.375000 | FeB43  | 0.625000 | 0.625000 | 0.125000 |
| O6A4 | 0.750000 | 0.000000 | 0.375000 | FeB44  | 0.625000 | 0.125000 | 0.125000 |

Fe<sub>3</sub>O<sub>4</sub> *d*=1%

Lattice constants:

|                  |                  |                  |
|------------------|------------------|------------------|
| 8.3961065817100  | 8.3961065817100  | 0.0000000000000  |
| -8.3958279109300 | 8.3958279109300  | 0.0000000000000  |
| -0.0004892468392 | -0.0004892468392 | 16.7918300731000 |

Fractional coordinates:

| site | <i>x</i>  | <i>y</i>  | <i>z</i>  | site   | <i>x</i>  | <i>y</i>  | <i>z</i> |
|------|-----------|-----------|-----------|--------|-----------|-----------|----------|
| O1   | 0.875008  | 0.875054  | 0.000001  | O6B1   | 0.000110  | -0.000023 | 0.624987 |
| O12  | 0.875011  | 0.375057  | -0.000016 | O6B2   | 0.000028  | 0.499987  | 0.625011 |
| O13  | 0.625019  | 0.875069  | 0.500050  | O6B3   | -0.000028 | -0.000022 | 0.875013 |
| O14  | 0.625006  | 0.375078  | 0.500058  | O6B4   | 0.000007  | 0.499982  | 0.875024 |
| O21  | 0.875014  | 0.624985  | -0.000003 | FeA11  | 0.875001  | 0.750013  | 0.062529 |
| O22  | 0.875020  | 0.124988  | 0.000000  | FeA12  | 0.875031  | 0.250020  | 0.062525 |
| O23  | 0.624985  | 0.624983  | 0.500034  | FeA13  | 0.624997  | 0.750028  | 0.437504 |
| O24  | 0.625008  | 0.124997  | 0.500018  | FeA14  | 0.625016  | 0.250040  | 0.437503 |
| O31  | 0.875028  | 0.874947  | 0.250027  | FeA21  | 0.874996  | 0.500048  | 0.187528 |
| O32  | 0.874992  | 0.375010  | 0.250051  | FeA22  | 0.875057  | 0.000007  | 0.187510 |
| O33  | 0.625044  | 0.875019  | 0.249957  | FeA23  | 0.625003  | 0.500016  | 0.312486 |
| O34  | 0.624999  | 0.374948  | 0.249957  | FeA24  | 0.625042  | 0.000050  | 0.312503 |
| O41  | 0.875023  | 0.625125  | 0.250048  | FeB1A1 | 0.750006  | -0.000021 | 0.000023 |
| O42  | 0.875030  | 0.125067  | 0.250018  | FeB1A2 | 0.750012  | 0.499987  | 0.000011 |
| O43  | 0.625044  | 0.625072  | 0.249968  | FeB1B1 | 0.000019  | 0.500005  | 0.500017 |
| O44  | 0.625021  | 0.125118  | 0.249993  | FeB1B2 | -0.000026 | 0.000008  | 0.499969 |
| O5A1 | 0.749935  | 0.750005  | 0.125053  | FeB2A1 | 0.749976  | 0.750064  | 0.250026 |
| O5A2 | 0.749985  | 0.250064  | 0.125054  | FeB2A2 | 0.750093  | 0.250022  | 0.250037 |
| O5A3 | 0.750027  | 0.750052  | 0.374972  | FeB2B1 | 0.000026  | 0.749937  | 0.750019 |
| O5A4 | 0.750059  | 0.250074  | 0.374992  | FeB2B2 | 0.000021  | 0.249959  | 0.750019 |
| O5B1 | 0.000101  | 0.749979  | 0.625041  | FeB31  | 0.875019  | 0.875045  | 0.375048 |
| O5B2 | 0.000052  | 0.249949  | 0.625058  | FeB32  | 0.875014  | 0.375125  | 0.375057 |
| O5B3 | -0.000051 | 0.749964  | 0.874972  | FeB33  | 0.625016  | 0.875116  | 0.124968 |
| O5B4 | -0.000027 | 0.249944  | 0.874962  | FeB34  | 0.625038  | 0.374996  | 0.124981 |
| O6A1 | 0.749931  | 0.500027  | 0.125008  | FeB41  | 0.875010  | 0.624998  | 0.375017 |
| O6A2 | 0.750010  | -0.000004 | 0.124998  | FeB42  | 0.875004  | 0.125059  | 0.374994 |
| O6A3 | 0.750024  | 0.500033  | 0.375015  | FeB43  | 0.625007  | 0.625028  | 0.125008 |
| O6A4 | 0.750096  | 0.000048  | 0.375017  | FeB44  | 0.625029  | 0.125010  | 0.125015 |

Fe<sub>3</sub>O<sub>4</sub> *d*=2%

Lattice constants:

|                  |                  |                  |
|------------------|------------------|------------------|
| 8.3962131634200  | 8.3962131634200  | 0.0000000000000  |
| -8.3956558218600 | 8.3956558218600  | 0.0000000000000  |
| -0.0009784936784 | -0.0009784936784 | 16.7916601462000 |

Fractional coordinates:

| site | <i>x</i>  | <i>y</i>  | <i>z</i>  | site   | <i>x</i>  | <i>y</i>  | <i>z</i> |
|------|-----------|-----------|-----------|--------|-----------|-----------|----------|
| O1   | 0.875016  | 0.875109  | 0.000003  | O6B1   | 0.000220  | -0.000046 | 0.624974 |
| O12  | 0.875021  | 0.375114  | -0.000033 | O6B2   | 0.000056  | 0.499974  | 0.625022 |
| O13  | 0.625038  | 0.875137  | 0.500100  | O6B3   | -0.000057 | -0.000045 | 0.875026 |
| O14  | 0.625011  | 0.375156  | 0.500116  | O6B4   | 0.000014  | 0.499965  | 0.875048 |
| O21  | 0.875027  | 0.624971  | -0.000006 | FeA11  | 0.875002  | 0.750027  | 0.062558 |
| O22  | 0.875040  | 0.124976  | 0.000001  | FeA12  | 0.875063  | 0.250041  | 0.062551 |
| O23  | 0.624970  | 0.624966  | 0.500068  | FeA13  | 0.624995  | 0.750055  | 0.437508 |
| O24  | 0.625015  | 0.124995  | 0.500036  | FeA14  | 0.625032  | 0.250080  | 0.437507 |
| O31  | 0.875056  | 0.874893  | 0.250054  | FeA21  | 0.874992  | 0.500095  | 0.187556 |
| O32  | 0.874984  | 0.375020  | 0.250102  | FeA22  | 0.875114  | 0.000015  | 0.187520 |
| O33  | 0.625088  | 0.875038  | 0.249915  | FeA23  | 0.625005  | 0.500032  | 0.312472 |
| O34  | 0.624998  | 0.374896  | 0.249913  | FeA24  | 0.625085  | 0.000100  | 0.312505 |
| O41  | 0.875046  | 0.625250  | 0.250095  | FeB1A1 | 0.750011  | -0.000042 | 0.000045 |
| O42  | 0.875060  | 0.125134  | 0.250036  | FeB1A2 | 0.750023  | 0.499973  | 0.000022 |
| O43  | 0.625088  | 0.625143  | 0.249936  | FeB1B1 | 0.000037  | 0.500010  | 0.500034 |
| O44  | 0.625042  | 0.125236  | 0.249985  | FeB1B2 | -0.000051 | 0.000015  | 0.499939 |
| O5A1 | 0.749870  | 0.750010  | 0.125106  | FeB2A1 | 0.749952  | 0.750128  | 0.250052 |
| O5A2 | 0.749971  | 0.250129  | 0.125107  | FeB2A2 | 0.750186  | 0.250044  | 0.250073 |
| O5A3 | 0.750054  | 0.750104  | 0.374945  | FeB2B1 | 0.000051  | 0.749874  | 0.750038 |
| O5A4 | 0.750117  | 0.250147  | 0.374984  | FeB2B2 | 0.000043  | 0.249918  | 0.750038 |
| O5B1 | 0.000201  | 0.749959  | 0.625082  | FeB31  | 0.875039  | 0.875089  | 0.375096 |
| O5B2 | 0.000103  | 0.249898  | 0.625116  | FeB32  | 0.875029  | 0.375249  | 0.375115 |
| O5B3 | -0.000103 | 0.749928  | 0.874943  | FeB33  | 0.625033  | 0.875232  | 0.124936 |
| O5B4 | -0.000055 | 0.249888  | 0.874925  | FeB34  | 0.625076  | 0.374992  | 0.124962 |
| O6A1 | 0.749863  | 0.500055  | 0.125016  | FeB41  | 0.875020  | 0.624996  | 0.375034 |
| O6A2 | 0.750021  | -0.000008 | 0.124995  | FeB42  | 0.875009  | 0.125117  | 0.374987 |
| O6A3 | 0.750048  | 0.500065  | 0.375030  | FeB43  | 0.625013  | 0.625055  | 0.125017 |
| O6A4 | 0.750192  | 0.000095  | 0.375034  | FeB44  | 0.625058  | 0.125020  | 0.125030 |

Fe<sub>3</sub>O<sub>4</sub> *d*=4%

Lattice constants:

|                  |                  |                  |
|------------------|------------------|------------------|
| 8.3964263268400  | 8.3964263268400  | 0.0000000000000  |
| -8.3953116437200 | 8.3953116437200  | 0.0000000000000  |
| -0.0019569873568 | -0.0019569873568 | 16.7913202924000 |

Fractional coordinates:

| site | <i>x</i>  | <i>y</i>  | <i>z</i>  | site   | <i>x</i>  | <i>y</i>  | <i>z</i> |
|------|-----------|-----------|-----------|--------|-----------|-----------|----------|
| O1   | 0.875032  | 0.875217  | 0.000006  | O6B1   | 0.000440  | -0.000092 | 0.624949 |
| O12  | 0.875043  | 0.375229  | -0.000066 | O6B2   | 0.000111  | 0.499948  | 0.625043 |
| O13  | 0.625076  | 0.875274  | 0.500200  | O6B3   | -0.000114 | -0.000089 | 0.875052 |
| O14  | 0.625022  | 0.375312  | 0.500232  | O6B4   | 0.000027  | 0.499930  | 0.875096 |
| O21  | 0.875054  | 0.624941  | -0.000011 | FeA11  | 0.875004  | 0.750053  | 0.062615 |
| O22  | 0.875079  | 0.124951  | 0.000001  | FeA12  | 0.875126  | 0.250082  | 0.062602 |
| O23  | 0.624941  | 0.624932  | 0.500136  | FeA13  | 0.624990  | 0.750110  | 0.437515 |
| O24  | 0.625030  | 0.124990  | 0.500071  | FeA14  | 0.625064  | 0.250159  | 0.437513 |
| O31  | 0.875112  | 0.874786  | 0.250107  | FeA21  | 0.874984  | 0.500191  | 0.187612 |
| O32  | 0.874968  | 0.375041  | 0.250205  | FeA22  | 0.875229  | 0.000030  | 0.187540 |
| O33  | 0.625177  | 0.875076  | 0.249830  | FeA23  | 0.625011  | 0.500065  | 0.312444 |
| O34  | 0.624997  | 0.374792  | 0.249827  | FeA24  | 0.625169  | 0.000201  | 0.312511 |
| O41  | 0.875093  | 0.625500  | 0.250190  | FeB1A1 | 0.750023  | -0.000085 | 0.000091 |
| O42  | 0.875120  | 0.125268  | 0.250072  | FeB1A2 | 0.750046  | 0.499946  | 0.000045 |
| O43  | 0.625175  | 0.625286  | 0.249872  | FeB1B1 | 0.000075  | 0.500020  | 0.500068 |
| O44  | 0.625083  | 0.125472  | 0.249970  | FeB1B2 | -0.000103 | 0.000030  | 0.499877 |
| O5A1 | 0.749740  | 0.750020  | 0.125212  | FeB2A1 | 0.749903  | 0.750256  | 0.250104 |
| O5A2 | 0.749942  | 0.250258  | 0.125214  | FeB2A2 | 0.750372  | 0.250088  | 0.250147 |
| O5A3 | 0.750108  | 0.750207  | 0.374890  | FeB2B1 | 0.000102  | 0.749749  | 0.750075 |
| O5A4 | 0.750234  | 0.250295  | 0.374968  | FeB2B2 | 0.000086  | 0.249835  | 0.750076 |
| O5B1 | 0.000402  | 0.749917  | 0.625164  | FeB31  | 0.875078  | 0.875178  | 0.375192 |
| O5B2 | 0.000207  | 0.249796  | 0.625232  | FeB32  | 0.875058  | 0.375499  | 0.375230 |
| O5B3 | -0.000206 | 0.749856  | 0.874887  | FeB33  | 0.625065  | 0.875465  | 0.124871 |
| O5B4 | -0.000110 | 0.249776  | 0.874850  | FeB34  | 0.625151  | 0.374985  | 0.124924 |
| O6A1 | 0.749726  | 0.500110  | 0.125032  | FeB41  | 0.875040  | 0.624993  | 0.375068 |
| O6A2 | 0.750041  | -0.000016 | 0.124990  | FeB42  | 0.875017  | 0.125235  | 0.374975 |
| O6A3 | 0.750096  | 0.500131  | 0.375061  | FeB43  | 0.625026  | 0.625110  | 0.125034 |
| O6A4 | 0.750385  | 0.000191  | 0.375068  | FeB44  | 0.625115  | 0.125040  | 0.125061 |

Fe<sub>3</sub>O<sub>4</sub> *d*=6%

Lattice constants:

|                  |                  |                  |
|------------------|------------------|------------------|
| 8.3966394902600  | 8.3966394902600  | 0.0000000000000  |
| -8.3949674655800 | 8.3949674655800  | 0.0000000000000  |
| -0.0029354810352 | -0.0029354810352 | 16.7909804386000 |

Fractional coordinates:

| site | <i>x</i>  | <i>y</i>  | <i>z</i>  | site   | <i>x</i>  | <i>y</i>  | <i>z</i> |
|------|-----------|-----------|-----------|--------|-----------|-----------|----------|
| O1   | 0.875049  | 0.875326  | 0.000008  | O6B1   | 0.000659  | -0.000137 | 0.624923 |
| O12  | 0.875064  | 0.375343  | -0.000098 | O6B2   | 0.000167  | 0.499922  | 0.625065 |
| O13  | 0.625115  | 0.875412  | 0.500300  | O6B3   | -0.000170 | -0.000134 | 0.875077 |
| O14  | 0.625034  | 0.375468  | 0.500347  | O6B4   | 0.000041  | 0.499894  | 0.875144 |
| O21  | 0.875082  | 0.624912  | -0.000017 | FeA11  | 0.875005  | 0.750080  | 0.062673 |
| O22  | 0.875119  | 0.124927  | 0.000002  | FeA12  | 0.875188  | 0.250122  | 0.062653 |
| O23  | 0.624911  | 0.624898  | 0.500204  | FeA13  | 0.624985  | 0.750166  | 0.437523 |
| O24  | 0.625045  | 0.124984  | 0.500107  | FeA14  | 0.625096  | 0.250239  | 0.437520 |
| O31  | 0.875168  | 0.874680  | 0.250161  | FeA21  | 0.874976  | 0.500286  | 0.187667 |
| O32  | 0.874952  | 0.375061  | 0.250307  | FeA22  | 0.875343  | 0.000044  | 0.187560 |
| O33  | 0.625265  | 0.875115  | 0.249744  | FeA23  | 0.625016  | 0.500097  | 0.312415 |
| O34  | 0.624995  | 0.374688  | 0.249740  | FeA24  | 0.625254  | 0.000301  | 0.312516 |
| O41  | 0.875139  | 0.625749  | 0.250286  | FeB1A1 | 0.750034  | -0.000127 | 0.000136 |
| O42  | 0.875181  | 0.125401  | 0.250108  | FeB1A2 | 0.750070  | 0.499919  | 0.000067 |
| O43  | 0.625263  | 0.625430  | 0.249809  | FeB1B1 | 0.000112  | 0.500030  | 0.500102 |
| O44  | 0.625125  | 0.125708  | 0.249955  | FeB1B2 | -0.000154 | 0.000046  | 0.499816 |
| O5A1 | 0.749610  | 0.750030  | 0.125318  | FeB2A1 | 0.749855  | 0.750383  | 0.250156 |
| O5A2 | 0.749912  | 0.250386  | 0.125321  | FeB2A2 | 0.750557  | 0.250132  | 0.250220 |
| O5A3 | 0.750163  | 0.750311  | 0.374834  | FeB2B1 | 0.000153  | 0.749623  | 0.750113 |
| O5A4 | 0.750352  | 0.250442  | 0.374952  | FeB2B2 | 0.000128  | 0.249753  | 0.750115 |
| O5B1 | 0.000604  | 0.749876  | 0.625245  | FeB31  | 0.875116  | 0.875267  | 0.375288 |
| O5B2 | 0.000310  | 0.249694  | 0.625348  | FeB32  | 0.875086  | 0.375748  | 0.375345 |
| O5B3 | -0.000309 | 0.749785  | 0.874830  | FeB33  | 0.625098  | 0.875697  | 0.124807 |
| O5B4 | -0.000164 | 0.249663  | 0.874774  | FeB34  | 0.625227  | 0.374977  | 0.124887 |
| O6A1 | 0.749589  | 0.500165  | 0.125049  | FeB41  | 0.875059  | 0.624989  | 0.375102 |
| O6A2 | 0.750062  | -0.000024 | 0.124986  | FeB42  | 0.875026  | 0.125352  | 0.374962 |
| O6A3 | 0.750143  | 0.500196  | 0.375091  | FeB43  | 0.625040  | 0.625166  | 0.125050 |
| O6A4 | 0.750577  | 0.000286  | 0.375102  | FeB44  | 0.625173  | 0.125061  | 0.125091 |

Fe<sub>3</sub>O<sub>4</sub> *d*=8%

Lattice constants:

|                  |                  |                  |
|------------------|------------------|------------------|
| 8.3968526536800  | 8.3968526536800  | 0.0000000000000  |
| -8.3946232874400 | 8.3946232874400  | 0.0000000000000  |
| -0.0039139747136 | -0.0039139747136 | 16.7906405848000 |

Fractional coordinates:

| site | <i>x</i>  | <i>y</i>  | <i>z</i>  | site   | <i>x</i>  | <i>y</i>  | <i>z</i> |
|------|-----------|-----------|-----------|--------|-----------|-----------|----------|
| O1   | 0.875065  | 0.875434  | 0.000011  | O6B1   | 0.000879  | -0.000183 | 0.624898 |
| O12  | 0.875086  | 0.375458  | -0.000131 | O6B2   | 0.000222  | 0.499896  | 0.625086 |
| O13  | 0.625153  | 0.875549  | 0.500400  | O6B3   | -0.000227 | -0.000178 | 0.875103 |
| O14  | 0.625045  | 0.375624  | 0.500463  | O6B4   | 0.000054  | 0.499859  | 0.875192 |
| O21  | 0.875109  | 0.624882  | -0.000022 | FeA11  | 0.875007  | 0.750106  | 0.062730 |
| O22  | 0.875158  | 0.124902  | 0.000002  | FeA12  | 0.875251  | 0.250163  | 0.062704 |
| O23  | 0.624882  | 0.624864  | 0.500272  | FeA13  | 0.624980  | 0.750221  | 0.437530 |
| O24  | 0.625060  | 0.124979  | 0.500142  | FeA14  | 0.625128  | 0.250318  | 0.437526 |
| O31  | 0.875224  | 0.874573  | 0.250214  | FeA21  | 0.874969  | 0.500382  | 0.187723 |
| O32  | 0.874936  | 0.375082  | 0.250410  | FeA22  | 0.875458  | 0.000059  | 0.187580 |
| O33  | 0.625354  | 0.875153  | 0.249659  | FeA23  | 0.625021  | 0.500130  | 0.312387 |
| O34  | 0.624994  | 0.374584  | 0.249654  | FeA24  | 0.625338  | 0.000402  | 0.312522 |
| O41  | 0.875186  | 0.625999  | 0.250381  | FeB1A1 | 0.750046  | -0.000170 | 0.000182 |
| O42  | 0.875241  | 0.125535  | 0.250144  | FeB1A2 | 0.750093  | 0.499892  | 0.000089 |
| O43  | 0.625350  | 0.625573  | 0.249745  | FeB1B1 | 0.000150  | 0.500040  | 0.500136 |
| O44  | 0.625166  | 0.125944  | 0.249940  | FeB1B2 | -0.000206 | 0.000061  | 0.499754 |
| O5A1 | 0.749480  | 0.750040  | 0.125424  | FeB2A1 | 0.749806  | 0.750511  | 0.250208 |
| O5A2 | 0.749883  | 0.250515  | 0.125428  | FeB2A2 | 0.750743  | 0.250176  | 0.250294 |
| O5A3 | 0.750217  | 0.750414  | 0.374779  | FeB2B1 | 0.000204  | 0.749498  | 0.750150 |
| O5A4 | 0.750469  | 0.250590  | 0.374936  | FeB2B2 | 0.000171  | 0.249670  | 0.750153 |
| O5B1 | 0.000805  | 0.749834  | 0.625327  | FeB31  | 0.875155  | 0.875356  | 0.375384 |
| O5B2 | 0.000414  | 0.249592  | 0.625464  | FeB32  | 0.875115  | 0.375998  | 0.375460 |
| O5B3 | -0.000412 | 0.749713  | 0.874774  | FeB33  | 0.625130  | 0.875930  | 0.124742 |
| O5B4 | -0.000219 | 0.249551  | 0.874699  | FeB34  | 0.625302  | 0.374970  | 0.124849 |
| O6A1 | 0.749452  | 0.500220  | 0.125065  | FeB41  | 0.875079  | 0.624986  | 0.375136 |
| O6A2 | 0.750082  | -0.000032 | 0.124981  | FeB42  | 0.875034  | 0.125470  | 0.374949 |
| O6A3 | 0.750191  | 0.500262  | 0.375122  | FeB43  | 0.625053  | 0.625221  | 0.125067 |
| O6A4 | 0.750770  | 0.000382  | 0.375136  | FeB44  | 0.625230  | 0.125081  | 0.125121 |

Fe<sub>3</sub>O<sub>4</sub> *d*=10%

Lattice constants:

|                  |                  |                  |
|------------------|------------------|------------------|
| 8.3970658171000  | 8.3970658171000  | 0.0000000000000  |
| -8.3942791093000 | 8.3942791093000  | 0.0000000000000  |
| -0.0048924683920 | -0.0048924683920 | 16.7903007310000 |

Fractional coordinates:

| site | <i>x</i>  | <i>y</i>  | <i>z</i>  | site   | <i>x</i>  | <i>y</i>  | <i>z</i> |
|------|-----------|-----------|-----------|--------|-----------|-----------|----------|
| O1   | 0.875081  | 0.875543  | 0.000014  | O6B1   | 0.001099  | -0.000229 | 0.624872 |
| O12  | 0.875107  | 0.375572  | -0.000164 | O6B2   | 0.000278  | 0.499870  | 0.625108 |
| O13  | 0.625191  | 0.875686  | 0.500500  | O6B3   | -0.000284 | -0.000223 | 0.875129 |
| O14  | 0.625056  | 0.375780  | 0.500579  | O6B4   | 0.000068  | 0.499824  | 0.875240 |
| O21  | 0.875136  | 0.624853  | -0.000028 | FeA11  | 0.875009  | 0.750133  | 0.062788 |
| O22  | 0.875198  | 0.124878  | 0.000003  | FeA12  | 0.875314  | 0.250204  | 0.062755 |
| O23  | 0.624852  | 0.624830  | 0.500340  | FeA13  | 0.624975  | 0.750276  | 0.437538 |
| O24  | 0.625075  | 0.124974  | 0.500178  | FeA14  | 0.62516   | 0.250398  | 0.437533 |
| O31  | 0.87528   | 0.874466  | 0.250268  | FeA21  | 0.874961  | 0.500477  | 0.187779 |
| O32  | 0.87492   | 0.375102  | 0.250512  | FeA22  | 0.875572  | 0.000074  | 0.187601 |
| O33  | 0.625442  | 0.875191  | 0.249574  | FeA23  | 0.625026  | 0.500162  | 0.312359 |
| O34  | 0.624992  | 0.374480  | 0.249567  | FeA24  | 0.625423  | 0.000502  | 0.312528 |
| O41  | 0.875232  | 0.626249  | 0.250476  | FeB1A1 | 0.750057  | -0.000212 | 0.000227 |
| O42  | 0.875301  | 0.125669  | 0.250180  | FeB1A2 | 0.750116  | 0.499865  | 0.000111 |
| O43  | 0.625438  | 0.625716  | 0.249681  | FeB1B1 | 0.000187  | 0.500050  | 0.500170 |
| O44  | 0.625208  | 0.126180  | 0.249925  | FeB1B2 | -0.000257 | 0.000076  | 0.499693 |
| O5A1 | 0.74935   | 0.750050  | 0.125530  | FeB2A1 | 0.749758  | 0.750639  | 0.250260 |
| O5A2 | 0.749854  | 0.250644  | 0.125535  | FeB2A2 | 0.750929  | 0.250220  | 0.250367 |
| O5A3 | 0.750271  | 0.750518  | 0.374724  | FeB2B1 | 0.000255  | 0.749372  | 0.750188 |
| O5A4 | 0.750586  | 0.250737  | 0.374920  | FeB2B2 | 0.000214  | 0.249588  | 0.750191 |
| O5B1 | 0.001006  | 0.749793  | 0.625409  | FeB31  | 0.875194  | 0.875445  | 0.375480 |
| O5B2 | 0.000517  | 0.249490  | 0.625580  | FeB32  | 0.875144  | 0.376247  | 0.375575 |
| O5B3 | -0.000515 | 0.749641  | 0.874717  | FeB33  | 0.625163  | 0.876162  | 0.124678 |
| O5B4 | -0.000274 | 0.249439  | 0.874624  | FeB34  | 0.625378  | 0.374962  | 0.124811 |
| O6A1 | 0.749315  | 0.500275  | 0.125081  | FeB41  | 0.875099  | 0.624982  | 0.375171 |
| O6A2 | 0.750103  | -0.000040 | 0.124976  | FeB42  | 0.875043  | 0.125587  | 0.374937 |
| O6A3 | 0.750239  | 0.500327  | 0.375152  | FeB43  | 0.625066  | 0.625276  | 0.125084 |
| O6A4 | 0.750962  | 0.000477  | 0.375170  | FeB44  | 0.625288  | 0.125101  | 0.125152 |

Fe<sub>3</sub>O<sub>4</sub> *d*=20%

Lattice constants:

|                  |                  |                  |
|------------------|------------------|------------------|
| 8.3981316342000  | 8.3981316342000  | 0.0000000000000  |
| -8.3925582186000 | 8.3925582186000  | 0.0000000000000  |
| -0.0097849367840 | -0.0097849367840 | 16.7886014620000 |

Fractional coordinates:

| site | <i>x</i>  | <i>y</i>  | <i>z</i>  | site   | <i>x</i>  | <i>y</i>  | <i>z</i> |
|------|-----------|-----------|-----------|--------|-----------|-----------|----------|
| O1   | 0.875162  | 0.876086  | 0.000028  | O6B1   | 0.002198  | -0.000458 | 0.624744 |
| O12  | 0.875214  | 0.376144  | -0.000328 | O6B2   | 0.000556  | 0.499740  | 0.625216 |
| O13  | 0.625382  | 0.876372  | 0.501000  | O6B3   | -0.000568 | -0.000446 | 0.875258 |
| O14  | 0.625112  | 0.376560  | 0.501158  | O6B4   | 0.000136  | 0.499648  | 0.875480 |
| O21  | 0.875272  | 0.624706  | -0.000056 | FeA11  | 0.875018  | 0.750266  | 0.063075 |
| O22  | 0.875396  | 0.124756  | 0.000006  | FeA12  | 0.875628  | 0.250408  | 0.063009 |
| O23  | 0.624704  | 0.624660  | 0.500680  | FeA13  | 0.62495   | 0.750552  | 0.437575 |
| O24  | 0.62515   | 0.124948  | 0.500356  | FeA14  | 0.62532   | 0.250796  | 0.437566 |
| O31  | 0.87556   | 0.873932  | 0.250536  | FeA21  | 0.874921  | 0.500954  | 0.188058 |
| O32  | 0.87484   | 0.375204  | 0.251024  | FeA22  | 0.876144  | 0.000148  | 0.187701 |
| O33  | 0.625884  | 0.875382  | 0.249148  | FeA23  | 0.625053  | 0.500324  | 0.312218 |
| O34  | 0.624984  | 0.373960  | 0.249134  | FeA24  | 0.625846  | 0.001005  | 0.312555 |
| O41  | 0.875464  | 0.627498  | 0.250952  | FeB1A1 | 0.750114  | -0.000424 | 0.000455 |
| O42  | 0.875602  | 0.126338  | 0.250360  | FeB1A2 | 0.750232  | 0.499730  | 0.000223 |
| O43  | 0.625876  | 0.626432  | 0.249362  | FeB1B1 | 0.000374  | 0.500100  | 0.500340 |
| O44  | 0.625416  | 0.127360  | 0.249850  | FeB1B2 | -0.000514 | 0.000152  | 0.499386 |
| O5A1 | 0.7487    | 0.750100  | 0.126060  | FeB2A1 | 0.749516  | 0.751278  | 0.250520 |
| O5A2 | 0.749708  | 0.251288  | 0.126070  | FeB2A2 | 0.751858  | 0.250439  | 0.250735 |
| O5A3 | 0.750542  | 0.751036  | 0.374448  | FeB2B1 | 0.00051   | 0.748744  | 0.750375 |
| O5A4 | 0.751172  | 0.251474  | 0.374840  | FeB2B2 | 0.000428  | 0.249176  | 0.750382 |
| O5B1 | 0.002012  | 0.749586  | 0.625818  | FeB31  | 0.875388  | 0.875890  | 0.375961 |
| O5B2 | 0.001034  | 0.248980  | 0.626160  | FeB32  | 0.875288  | 0.377495  | 0.376150 |
| O5B3 | -0.00103  | 0.749282  | 0.874434  | FeB33  | 0.625326  | 0.877325  | 0.124355 |
| O5B4 | -0.000548 | 0.248878  | 0.874248  | FeB34  | 0.625756  | 0.374924  | 0.124622 |
| O6A1 | 0.74863   | 0.500550  | 0.125162  | FeB41  | 0.875198  | 0.624964  | 0.375341 |
| O6A2 | 0.750206  | -0.000080 | 0.124952  | FeB42  | 0.875086  | 0.126174  | 0.374873 |
| O6A3 | 0.750478  | 0.500654  | 0.375304  | FeB43  | 0.625132  | 0.625552  | 0.125168 |
| O6A4 | 0.751924  | 0.000954  | 0.375340  | FeB44  | 0.625576  | 0.125202  | 0.125303 |

Fe<sub>3</sub>O<sub>4</sub> *d*=30%

Lattice constants:

|                  |                  |                  |
|------------------|------------------|------------------|
| 8.3991974513000  | 8.3991974513000  | 0.0000000000000  |
| -8.3908373279000 | 8.3908373279000  | 0.0000000000000  |
| -0.0146774051760 | -0.0146774051760 | 16.7869021930000 |

Fractional coordinates:

| site | <i>x</i>  | <i>y</i>  | <i>z</i>  | site   | <i>x</i>  | <i>y</i>  | <i>z</i> |
|------|-----------|-----------|-----------|--------|-----------|-----------|----------|
| O1   | 0.875243  | 0.876629  | 0.000042  | O6B1   | 0.003297  | -0.000687 | 0.624616 |
| O12  | 0.875321  | 0.376716  | -0.000492 | O6B2   | 0.000834  | 0.499610  | 0.625324 |
| O13  | 0.625573  | 0.877058  | 0.501500  | O6B3   | -0.000852 | -0.000669 | 0.875387 |
| O14  | 0.625168  | 0.377340  | 0.501737  | O6B4   | 0.000204  | 0.499472  | 0.875720 |
| O21  | 0.875408  | 0.624559  | -0.000084 | FeA11  | 0.875027  | 0.750399  | 0.063363 |
| O22  | 0.875594  | 0.124634  | 0.000009  | FeA12  | 0.875942  | 0.250612  | 0.063264 |
| O23  | 0.624556  | 0.624490  | 0.501020  | FeA13  | 0.624925  | 0.750828  | 0.437613 |
| O24  | 0.625225  | 0.124922  | 0.500534  | FeA14  | 0.62548   | 0.251194  | 0.437599 |
| O31  | 0.87584   | 0.873398  | 0.250804  | FeA21  | 0.874882  | 0.501431  | 0.188337 |
| O32  | 0.87476   | 0.375306  | 0.251536  | FeA22  | 0.876717  | 0.000222  | 0.187802 |
| O33  | 0.626326  | 0.875573  | 0.248722  | FeA23  | 0.625079  | 0.500486  | 0.312077 |
| O34  | 0.624976  | 0.373440  | 0.248701  | FeA24  | 0.626269  | 0.001507  | 0.312582 |
| O41  | 0.875696  | 0.628747  | 0.251428  | FeB1A1 | 0.750171  | -0.000636 | 0.000682 |
| O42  | 0.875903  | 0.127007  | 0.250540  | FeB1A2 | 0.750348  | 0.499595  | 0.000334 |
| O43  | 0.626314  | 0.627148  | 0.249043  | FeB1B1 | 0.000561  | 0.500150  | 0.500510 |
| O44  | 0.625624  | 0.128540  | 0.249775  | FeB1B2 | -0.000771 | 0.000228  | 0.499079 |
| O5A1 | 0.74805   | 0.750150  | 0.126590  | FeB2A1 | 0.749274  | 0.751917  | 0.250781 |
| O5A2 | 0.749562  | 0.251932  | 0.126605  | FeB2A2 | 0.752787  | 0.250659  | 0.251102 |
| O5A3 | 0.750813  | 0.751554  | 0.374172  | FeB2B1 | 0.000765  | 0.748116  | 0.750563 |
| O5A4 | 0.751758  | 0.252211  | 0.374760  | FeB2B2 | 0.000642  | 0.248764  | 0.750573 |
| O5B1 | 0.003018  | 0.749379  | 0.626227  | FeB31  | 0.875582  | 0.876335  | 0.376441 |
| O5B2 | 0.001551  | 0.248470  | 0.626740  | FeB32  | 0.875432  | 0.378742  | 0.376725 |
| O5B3 | -0.001545 | 0.748923  | 0.874151  | FeB33  | 0.625489  | 0.878487  | 0.124033 |
| O5B4 | -0.000822 | 0.248317  | 0.873872  | FeB34  | 0.626134  | 0.374886  | 0.124434 |
| O6A1 | 0.747945  | 0.500825  | 0.125243  | FeB41  | 0.875297  | 0.624946  | 0.375512 |
| O6A2 | 0.750309  | -0.000120 | 0.124928  | FeB42  | 0.875129  | 0.126761  | 0.374810 |
| O6A3 | 0.750717  | 0.500981  | 0.375456  | FeB43  | 0.625198  | 0.625828  | 0.125252 |
| O6A4 | 0.752886  | 0.001431  | 0.375510  | FeB44  | 0.625864  | 0.125303  | 0.125455 |

Fe<sub>3</sub>O<sub>4</sub> d=40%

Lattice constants:

|                  |                  |                  |
|------------------|------------------|------------------|
| 8.4002632684000  | 8.4002632684000  | 0.0000000000000  |
| -8.3891164372000 | 8.3891164372000  | 0.0000000000000  |
| -0.0195698735680 | -0.0195698735680 | 16.7852029240000 |

Fractional coordinates:

| site | x         | y         | z         | site   | x         | y         | z        |
|------|-----------|-----------|-----------|--------|-----------|-----------|----------|
| O1   | 0.875324  | 0.877172  | 0.000056  | O6B1   | 0.004396  | -0.000916 | 0.624488 |
| O12  | 0.875428  | 0.377288  | -0.000656 | O6B2   | 0.001112  | 0.499480  | 0.625432 |
| O13  | 0.625764  | 0.877744  | 0.502000  | O6B3   | -0.001136 | -0.000892 | 0.875516 |
| O14  | 0.625224  | 0.378120  | 0.502316  | O6B4   | 0.000272  | 0.499296  | 0.875960 |
| O21  | 0.875544  | 0.624412  | -0.000112 | FeA11  | 0.875036  | 0.750532  | 0.063651 |
| O22  | 0.875792  | 0.124512  | 0.000012  | FeA12  | 0.876256  | 0.250816  | 0.063518 |
| O23  | 0.624408  | 0.624320  | 0.501360  | FeA13  | 0.624900  | 0.751104  | 0.437651 |
| O24  | 0.625300  | 0.124896  | 0.500712  | FeA14  | 0.625640  | 0.251592  | 0.437632 |
| O31  | 0.876120  | 0.872864  | 0.251072  | FeA21  | 0.874843  | 0.501908  | 0.188616 |
| O32  | 0.874680  | 0.375408  | 0.252048  | FeA22  | 0.877289  | 0.000296  | 0.187902 |
| O33  | 0.626768  | 0.875764  | 0.248296  | FeA23  | 0.625105  | 0.500648  | 0.311936 |
| O34  | 0.624968  | 0.372920  | 0.248268  | FeA24  | 0.626692  | 0.002010  | 0.312610 |
| O41  | 0.875928  | 0.629996  | 0.251904  | FeB1A1 | 0.750228  | -0.000848 | 0.000909 |
| O42  | 0.876204  | 0.127676  | 0.250720  | FeB1A2 | 0.750464  | 0.499460  | 0.000446 |
| O43  | 0.626752  | 0.627864  | 0.248724  | FeB1B1 | 0.000748  | 0.500200  | 0.500680 |
| O44  | 0.625832  | 0.129720  | 0.249700  | FeB1B2 | -0.001028 | 0.000304  | 0.498772 |
| O5A1 | 0.747400  | 0.750200  | 0.127120  | FeB2A1 | 0.749032  | 0.752556  | 0.251041 |
| O5A2 | 0.749416  | 0.252576  | 0.127140  | FeB2A2 | 0.753716  | 0.250879  | 0.251469 |
| O5A3 | 0.751084  | 0.752072  | 0.373896  | FeB2B1 | 0.001020  | 0.747488  | 0.750751 |
| O5A4 | 0.752344  | 0.252948  | 0.374680  | FeB2B2 | 0.000856  | 0.248352  | 0.750764 |
| O5B1 | 0.004024  | 0.749172  | 0.626636  | FeB31  | 0.875776  | 0.876780  | 0.376922 |
| O5B2 | 0.002068  | 0.247960  | 0.627320  | FeB32  | 0.875576  | 0.379989  | 0.377300 |
| O5B3 | -0.002060 | 0.748564  | 0.873868  | FeB33  | 0.625652  | 0.879650  | 0.123710 |
| O5B4 | -0.001096 | 0.247756  | 0.873496  | FeB34  | 0.626512  | 0.374848  | 0.124245 |
| O6A1 | 0.747260  | 0.501100  | 0.125324  | FeB41  | 0.875396  | 0.624928  | 0.375682 |
| O6A2 | 0.750412  | -0.000160 | 0.124904  | FeB42  | 0.875172  | 0.127348  | 0.374746 |
| O6A3 | 0.750956  | 0.501308  | 0.375608  | FeB43  | 0.625264  | 0.626104  | 0.125336 |
| O6A4 | 0.753848  | 0.001908  | 0.375680  | FeB44  | 0.626152  | 0.125404  | 0.125607 |

Fe<sub>3</sub>O<sub>4</sub> *d*=50%

Lattice constants:

|                  |                  |                  |
|------------------|------------------|------------------|
| 8.4013290855000  | 8.4013290855000  | 0.0000000000000  |
| -8.3873955465000 | 8.3873955465000  | 0.0000000000000  |
| -0.0244623419600 | -0.0244623419600 | 16.7835036550000 |

Fractional coordinates:

| site | <i>x</i>  | <i>y</i>  | <i>z</i>  | site   | <i>x</i>  | <i>y</i>  | <i>z</i> |
|------|-----------|-----------|-----------|--------|-----------|-----------|----------|
| O1   | 0.875405  | 0.877715  | 0.000070  | O6B1   | 0.005495  | -0.001145 | 0.624360 |
| O12  | 0.875535  | 0.377860  | -0.000820 | O6B2   | 0.001390  | 0.499350  | 0.625540 |
| O13  | 0.625955  | 0.878430  | 0.502500  | O6B3   | -0.001420 | -0.001115 | 0.875645 |
| O14  | 0.625280  | 0.378900  | 0.502895  | O6B4   | 0.000340  | 0.499120  | 0.876200 |
| O21  | 0.875680  | 0.624265  | -0.000140 | FeA11  | 0.875045  | 0.750665  | 0.063939 |
| O22  | 0.875990  | 0.124390  | 0.000015  | FeA12  | 0.876570  | 0.251020  | 0.063773 |
| O23  | 0.624260  | 0.624150  | 0.501700  | FeA13  | 0.624875  | 0.751380  | 0.437689 |
| O24  | 0.625375  | 0.124870  | 0.500890  | FeA14  | 0.625800  | 0.251990  | 0.437665 |
| O31  | 0.876400  | 0.872330  | 0.251340  | FeA21  | 0.874804  | 0.502385  | 0.188895 |
| O32  | 0.874600  | 0.375510  | 0.252560  | FeA22  | 0.877861  | 0.000370  | 0.188003 |
| O33  | 0.627210  | 0.875955  | 0.247870  | FeA23  | 0.625131  | 0.500810  | 0.311795 |
| O34  | 0.624960  | 0.372400  | 0.247835  | FeA24  | 0.627115  | 0.002512  | 0.312638 |
| O41  | 0.876160  | 0.631245  | 0.252380  | FeB1A1 | 0.750285  | -0.001060 | 0.001136 |
| O42  | 0.876505  | 0.128345  | 0.250900  | FeB1A2 | 0.750580  | 0.499325  | 0.000557 |
| O43  | 0.627190  | 0.628580  | 0.248405  | FeB1B1 | 0.000935  | 0.500250  | 0.500850 |
| O44  | 0.626040  | 0.130900  | 0.249625  | FeB1B2 | -0.001285 | 0.000380  | 0.498466 |
| O5A1 | 0.746750  | 0.750250  | 0.127650  | FeB2A1 | 0.748790  | 0.753196  | 0.251301 |
| O5A2 | 0.749270  | 0.253220  | 0.127675  | FeB2A2 | 0.754645  | 0.251099  | 0.251837 |
| O5A3 | 0.751355  | 0.752590  | 0.373620  | FeB2B1 | 0.001275  | 0.746860  | 0.750938 |
| O5A4 | 0.752930  | 0.253685  | 0.374600  | FeB2B2 | 0.001070  | 0.247940  | 0.750955 |
| O5B1 | 0.005030  | 0.748965  | 0.627045  | FeB31  | 0.875970  | 0.877225  | 0.377402 |
| O5B2 | 0.002585  | 0.247450  | 0.627900  | FeB32  | 0.875720  | 0.381236  | 0.377875 |
| O5B3 | -0.002575 | 0.748205  | 0.873585  | FeB33  | 0.625815  | 0.880812  | 0.123388 |
| O5B4 | -0.001370 | 0.247195  | 0.873120  | FeB34  | 0.626890  | 0.374810  | 0.124056 |
| O6A1 | 0.746575  | 0.501375  | 0.125405  | FeB41  | 0.875495  | 0.624910  | 0.375853 |
| O6A2 | 0.750515  | -0.000200 | 0.124880  | FeB42  | 0.875215  | 0.127935  | 0.374683 |
| O6A3 | 0.751195  | 0.501635  | 0.375760  | FeB43  | 0.625330  | 0.626380  | 0.125420 |
| O6A4 | 0.754810  | 0.002385  | 0.375850  | FeB44  | 0.626440  | 0.125505  | 0.125758 |

Fe<sub>3</sub>O<sub>4</sub> *d*=60%

Lattice constants:

|                  |                  |                  |
|------------------|------------------|------------------|
| 8.4023949026000  | 8.4023949026000  | 0.0000000000000  |
| -8.3856746558000 | 8.3856746558000  | 0.0000000000000  |
| -0.0293548103520 | -0.0293548103520 | 16.7818043860000 |

Fractional coordinates:

| site | <i>x</i>  | <i>y</i>  | <i>z</i>  | site   | <i>x</i>  | <i>y</i>  | <i>z</i> |
|------|-----------|-----------|-----------|--------|-----------|-----------|----------|
| O1   | 0.875486  | 0.878258  | 0.000084  | O6B1   | 0.006594  | -0.001374 | 0.624232 |
| O12  | 0.875642  | 0.378432  | -0.000984 | O6B2   | 0.001668  | 0.499220  | 0.625648 |
| O13  | 0.626146  | 0.879116  | 0.503000  | O6B3   | -0.001704 | -0.001338 | 0.875774 |
| O14  | 0.625336  | 0.379680  | 0.503474  | O6B4   | 0.000408  | 0.498944  | 0.876440 |
| O21  | 0.875816  | 0.624118  | -0.000168 | FeA11  | 0.875054  | 0.750798  | 0.064226 |
| O22  | 0.876188  | 0.124268  | 0.000018  | FeA12  | 0.876884  | 0.251224  | 0.064028 |
| O23  | 0.624112  | 0.623980  | 0.502040  | FeA13  | 0.624850  | 0.751656  | 0.437726 |
| O24  | 0.625450  | 0.124844  | 0.501068  | FeA14  | 0.625960  | 0.252388  | 0.437698 |
| O31  | 0.876680  | 0.871796  | 0.251608  | FeA21  | 0.874764  | 0.502862  | 0.189174 |
| O32  | 0.874520  | 0.375612  | 0.253072  | FeA22  | 0.878433  | 0.000444  | 0.188104 |
| O33  | 0.627652  | 0.876146  | 0.247444  | FeA23  | 0.625158  | 0.500972  | 0.311654 |
| O34  | 0.624952  | 0.371880  | 0.247402  | FeA24  | 0.627537  | 0.003014  | 0.312665 |
| O41  | 0.876392  | 0.632494  | 0.252856  | FeB1A1 | 0.750342  | -0.001272 | 0.001364 |
| O42  | 0.876806  | 0.129014  | 0.251080  | FeB1A2 | 0.750696  | 0.499190  | 0.000668 |
| O43  | 0.627628  | 0.629296  | 0.248086  | FeB1B1 | 0.001122  | 0.500300  | 0.501020 |
| O44  | 0.626248  | 0.132080  | 0.249550  | FeB1B2 | -0.001542 | 0.000456  | 0.498159 |
| O5A1 | 0.746100  | 0.750300  | 0.128180  | FeB2A1 | 0.748548  | 0.753835  | 0.251561 |
| O5A2 | 0.749124  | 0.253864  | 0.128210  | FeB2A2 | 0.755574  | 0.251318  | 0.252204 |
| O5A3 | 0.751626  | 0.753108  | 0.373344  | FeB2B1 | 0.001530  | 0.746232  | 0.751126 |
| O5A4 | 0.753516  | 0.254422  | 0.374520  | FeB2B2 | 0.001284  | 0.247528  | 0.751146 |
| O5B1 | 0.006036  | 0.748758  | 0.627454  | FeB31  | 0.876164  | 0.877670  | 0.377883 |
| O5B2 | 0.003102  | 0.246940  | 0.628480  | FeB32  | 0.875864  | 0.382484  | 0.378449 |
| O5B3 | -0.003090 | 0.747846  | 0.873302  | FeB33  | 0.625978  | 0.881974  | 0.123066 |
| O5B4 | -0.001644 | 0.246634  | 0.872744  | FeB34  | 0.627268  | 0.374773  | 0.123867 |
| O6A1 | 0.745890  | 0.501650  | 0.125486  | FeB41  | 0.875594  | 0.624892  | 0.376024 |
| O6A2 | 0.750618  | -0.000240 | 0.124856  | FeB42  | 0.875258  | 0.128522  | 0.374619 |
| O6A3 | 0.751434  | 0.501962  | 0.375912  | FeB43  | 0.625396  | 0.626656  | 0.125504 |
| O6A4 | 0.755772  | 0.002862  | 0.376020  | FeB44  | 0.626728  | 0.125606  | 0.125910 |

Fe<sub>3</sub>O<sub>4</sub> *d*=70%

Lattice constants:

|                  |                  |                  |
|------------------|------------------|------------------|
| 8.4034607197000  | 8.4034607197000  | 0.0000000000000  |
| -8.3839537651000 | 8.3839537651000  | 0.0000000000000  |
| -0.0342472787440 | -0.0342472787440 | 16.7801051170000 |

Fractional coordinates:

| site | <i>x</i>  | <i>y</i>  | <i>z</i>  | site   | <i>x</i>  | <i>y</i>  | <i>z</i> |
|------|-----------|-----------|-----------|--------|-----------|-----------|----------|
| O1   | 0.875567  | 0.878801  | 0.000098  | O6B1   | 0.007693  | -0.001603 | 0.624104 |
| O12  | 0.875749  | 0.379004  | -0.001148 | O6B2   | 0.001946  | 0.499090  | 0.625756 |
| O13  | 0.626337  | 0.879802  | 0.503500  | O6B3   | -0.001988 | -0.001561 | 0.875903 |
| O14  | 0.625392  | 0.380460  | 0.504053  | O6B4   | 0.000476  | 0.498768  | 0.876680 |
| O21  | 0.875952  | 0.623971  | -0.000196 | FeA11  | 0.875063  | 0.750931  | 0.064514 |
| O22  | 0.876386  | 0.124146  | 0.000021  | FeA12  | 0.877198  | 0.251428  | 0.064282 |
| O23  | 0.623964  | 0.623810  | 0.502380  | FeA13  | 0.624825  | 0.751932  | 0.437764 |
| O24  | 0.625525  | 0.124818  | 0.501246  | FeA14  | 0.626120  | 0.252786  | 0.437731 |
| O31  | 0.876960  | 0.871262  | 0.251876  | FeA21  | 0.874725  | 0.503339  | 0.189453 |
| O32  | 0.874440  | 0.375714  | 0.253584  | FeA22  | 0.879005  | 0.000518  | 0.188204 |
| O33  | 0.628094  | 0.876337  | 0.247018  | FeA23  | 0.625184  | 0.501134  | 0.311513 |
| O34  | 0.624944  | 0.371360  | 0.246969  | FeA24  | 0.627960  | 0.003517  | 0.312693 |
| O41  | 0.876624  | 0.633743  | 0.253332  | FeB1A1 | 0.750399  | -0.001484 | 0.001591 |
| O42  | 0.877107  | 0.129683  | 0.251260  | FeB1A2 | 0.750812  | 0.499055  | 0.000780 |
| O43  | 0.628066  | 0.630012  | 0.247767  | FeB1B1 | 0.001309  | 0.500350  | 0.501190 |
| O44  | 0.626456  | 0.133260  | 0.249475  | FeB1B2 | -0.001799 | 0.000532  | 0.497852 |
| O5A1 | 0.745450  | 0.750350  | 0.128710  | FeB2A1 | 0.748306  | 0.754474  | 0.251821 |
| O5A2 | 0.748978  | 0.254508  | 0.128745  | FeB2A2 | 0.756503  | 0.251538  | 0.252571 |
| O5A3 | 0.751897  | 0.753626  | 0.373068  | FeB2B1 | 0.001785  | 0.745604  | 0.751314 |
| O5A4 | 0.754102  | 0.255159  | 0.374440  | FeB2B2 | 0.001498  | 0.247116  | 0.751337 |
| O5B1 | 0.007042  | 0.748551  | 0.627863  | FeB31  | 0.876358  | 0.878115  | 0.378364 |
| O5B2 | 0.003619  | 0.246430  | 0.629060  | FeB32  | 0.876008  | 0.383731  | 0.379024 |
| O5B3 | -0.003605 | 0.747487  | 0.873019  | FeB33  | 0.626141  | 0.883137  | 0.122743 |
| O5B4 | -0.001918 | 0.246073  | 0.872368  | FeB34  | 0.627646  | 0.374735  | 0.123678 |
| O6A1 | 0.745205  | 0.501925  | 0.125567  | FeB41  | 0.875693  | 0.624874  | 0.376194 |
| O6A2 | 0.750721  | -0.000280 | 0.124832  | FeB42  | 0.875301  | 0.129109  | 0.374555 |
| O6A3 | 0.751673  | 0.502289  | 0.376064  | FeB43  | 0.625462  | 0.626932  | 0.125588 |
| O6A4 | 0.756734  | 0.003339  | 0.376190  | FeB44  | 0.627016  | 0.125707  | 0.126062 |

Fe<sub>3</sub>O<sub>4</sub> *d*=80%

Lattice constants:

|                  |                  |                  |
|------------------|------------------|------------------|
| 8.4045265368000  | 8.4045265368000  | 0.0000000000000  |
| -8.3822328744000 | 8.3822328744000  | 0.0000000000000  |
| -0.0391397471360 | -0.0391397471360 | 16.7784058480000 |

Fractional coordinates:

| site | <i>x</i>  | <i>y</i>  | <i>z</i>  | site   | <i>x</i>  | <i>y</i>  | <i>z</i> |
|------|-----------|-----------|-----------|--------|-----------|-----------|----------|
| O1   | 0.875648  | 0.879344  | 0.000112  | O6B1   | 0.008792  | -0.001832 | 0.623976 |
| O12  | 0.875856  | 0.379576  | -0.001312 | O6B2   | 0.002224  | 0.498960  | 0.625864 |
| O13  | 0.626528  | 0.880488  | 0.504000  | O6B3   | -0.002272 | -0.001784 | 0.876032 |
| O14  | 0.625448  | 0.381240  | 0.504632  | O6B4   | 0.000544  | 0.498592  | 0.876920 |
| O21  | 0.876088  | 0.623824  | -0.000224 | FeA11  | 0.875072  | 0.751064  | 0.064802 |
| O22  | 0.876584  | 0.124024  | 0.000024  | FeA12  | 0.877512  | 0.251632  | 0.064537 |
| O23  | 0.623816  | 0.623640  | 0.502720  | FeA13  | 0.624800  | 0.752208  | 0.437802 |
| O24  | 0.625600  | 0.124792  | 0.501424  | FeA14  | 0.626280  | 0.253184  | 0.437764 |
| O31  | 0.877240  | 0.870728  | 0.252144  | FeA21  | 0.874686  | 0.503816  | 0.189732 |
| O32  | 0.874360  | 0.375816  | 0.254096  | FeA22  | 0.879578  | 0.000592  | 0.188305 |
| O33  | 0.628536  | 0.876528  | 0.246592  | FeA23  | 0.625210  | 0.501296  | 0.311372 |
| O34  | 0.624936  | 0.370840  | 0.246536  | FeA24  | 0.628383  | 0.004019  | 0.312720 |
| O41  | 0.876856  | 0.634992  | 0.253808  | FeB1A1 | 0.750456  | -0.001696 | 0.001818 |
| O42  | 0.877408  | 0.130352  | 0.251440  | FeB1A2 | 0.750928  | 0.498920  | 0.000891 |
| O43  | 0.628504  | 0.630728  | 0.247448  | FeB1B1 | 0.001496  | 0.500400  | 0.501360 |
| O44  | 0.626664  | 0.134440  | 0.249400  | FeB1B2 | -0.002056 | 0.000608  | 0.497545 |
| O5A1 | 0.744800  | 0.750400  | 0.129240  | FeB2A1 | 0.748064  | 0.755113  | 0.252082 |
| O5A2 | 0.748832  | 0.255152  | 0.129280  | FeB2A2 | 0.757432  | 0.251758  | 0.252938 |
| O5A3 | 0.752168  | 0.754144  | 0.372792  | FeB2B1 | 0.002040  | 0.744976  | 0.751502 |
| O5A4 | 0.754688  | 0.255896  | 0.374360  | FeB2B2 | 0.001712  | 0.246704  | 0.751528 |
| O5B1 | 0.008048  | 0.748344  | 0.628272  | FeB31  | 0.876552  | 0.878560  | 0.378844 |
| O5B2 | 0.004136  | 0.245920  | 0.629640  | FeB32  | 0.876152  | 0.384978  | 0.379599 |
| O5B3 | -0.004120 | 0.747128  | 0.872736  | FeB33  | 0.626304  | 0.884299  | 0.122421 |
| O5B4 | -0.002192 | 0.245512  | 0.871992  | FeB34  | 0.628024  | 0.374697  | 0.123490 |
| O6A1 | 0.744520  | 0.502200  | 0.125648  | FeB41  | 0.875792  | 0.624856  | 0.376365 |
| O6A2 | 0.750824  | -0.000320 | 0.124808  | FeB42  | 0.875344  | 0.129696  | 0.374492 |
| O6A3 | 0.751912  | 0.502616  | 0.376216  | FeB43  | 0.625528  | 0.627208  | 0.125672 |
| O6A4 | 0.757696  | 0.003816  | 0.376360  | FeB44  | 0.627304  | 0.125808  | 0.126214 |

Fe<sub>3</sub>O<sub>4</sub> *d*=90%

Lattice constants:

|                  |                  |                  |
|------------------|------------------|------------------|
| 8.4055923539000  | 8.4055923539000  | 0.0000000000000  |
| -8.3805119837000 | 8.3805119837000  | 0.0000000000000  |
| -0.0440322155280 | -0.0440322155280 | 16.7767065790000 |

Fractional coordinates:

| site | <i>x</i>  | <i>y</i>  | <i>z</i>  | site   | <i>x</i>  | <i>y</i>  | <i>z</i> |
|------|-----------|-----------|-----------|--------|-----------|-----------|----------|
| O1   | 0.875729  | 0.879887  | 0.000126  | O6B1   | 0.009891  | -0.002061 | 0.623848 |
| O12  | 0.875963  | 0.380148  | -0.001476 | O6B2   | 0.002502  | 0.498830  | 0.625972 |
| O13  | 0.626719  | 0.881174  | 0.504500  | O6B3   | -0.002556 | -0.002007 | 0.876161 |
| O14  | 0.625504  | 0.382020  | 0.505211  | O6B4   | 0.000612  | 0.498416  | 0.877160 |
| O21  | 0.876224  | 0.623677  | -0.000252 | FeA11  | 0.875081  | 0.751197  | 0.065089 |
| O22  | 0.876782  | 0.123902  | 0.000027  | FeA12  | 0.877826  | 0.251836  | 0.064791 |
| O23  | 0.623668  | 0.623470  | 0.503060  | FeA13  | 0.624775  | 0.752484  | 0.437839 |
| O24  | 0.625675  | 0.124766  | 0.501602  | FeA14  | 0.626440  | 0.253582  | 0.437797 |
| O31  | 0.877520  | 0.870194  | 0.252412  | FeA21  | 0.874646  | 0.504293  | 0.190011 |
| O32  | 0.874280  | 0.375918  | 0.254608  | FeA22  | 0.880150  | 0.000666  | 0.188405 |
| O33  | 0.628978  | 0.876719  | 0.246166  | FeA23  | 0.625237  | 0.501458  | 0.311231 |
| O34  | 0.624928  | 0.370320  | 0.246103  | FeA24  | 0.628806  | 0.004522  | 0.312748 |
| O41  | 0.877088  | 0.636241  | 0.254284  | FeB1A1 | 0.750513  | -0.001908 | 0.002046 |
| O42  | 0.877709  | 0.131021  | 0.251620  | FeB1A2 | 0.751044  | 0.498785  | 0.001003 |
| O43  | 0.628942  | 0.631444  | 0.247129  | FeB1B1 | 0.001683  | 0.500450  | 0.501530 |
| O44  | 0.626872  | 0.135620  | 0.249325  | FeB1B2 | -0.002313 | 0.000684  | 0.497238 |
| O5A1 | 0.744150  | 0.750450  | 0.129770  | FeB2A1 | 0.747822  | 0.755752  | 0.252342 |
| O5A2 | 0.748686  | 0.255796  | 0.129815  | FeB2A2 | 0.758361  | 0.251977  | 0.253306 |
| O5A3 | 0.752439  | 0.754662  | 0.372516  | FeB2B1 | 0.002295  | 0.744348  | 0.751689 |
| O5A4 | 0.755274  | 0.256633  | 0.374280  | FeB2B2 | 0.001926  | 0.246292  | 0.751719 |
| O5B1 | 0.009054  | 0.748137  | 0.628681  | FeB31  | 0.876746  | 0.879005  | 0.379325 |
| O5B2 | 0.004653  | 0.245410  | 0.630220  | FeB32  | 0.876296  | 0.386226  | 0.380174 |
| O5B3 | -0.004635 | 0.746769  | 0.872453  | FeB33  | 0.626467  | 0.885462  | 0.122098 |
| O5B4 | -0.002466 | 0.244951  | 0.871616  | FeB34  | 0.628402  | 0.374659  | 0.123301 |
| O6A1 | 0.743835  | 0.502475  | 0.125729  | FeB41  | 0.875891  | 0.624838  | 0.376535 |
| O6A2 | 0.750927  | -0.000360 | 0.124784  | FeB42  | 0.875387  | 0.130283  | 0.374428 |
| O6A3 | 0.752151  | 0.502943  | 0.376368  | FeB43  | 0.625594  | 0.627484  | 0.125756 |
| O6A4 | 0.758658  | 0.004293  | 0.376530  | FeB44  | 0.627592  | 0.125909  | 0.126365 |

Fe<sub>3</sub>O<sub>4</sub> *d*=100%

Lattice constants:

|                  |                  |                  |
|------------------|------------------|------------------|
| 8.4066581710000  | 8.4066581710000  | 0.0000000000000  |
| -8.3787910930000 | 8.3787910930000  | 0.0000000000000  |
| -0.0489246839200 | -0.0489246839200 | 16.7750073100000 |

Fractional coordinates:

| site | <i>x</i>  | <i>y</i>  | <i>z</i>  | site   | <i>x</i>  | <i>y</i>  | <i>z</i> |
|------|-----------|-----------|-----------|--------|-----------|-----------|----------|
| O1   | 0.875810  | 0.880430  | 0.000140  | O6B1   | 0.010990  | -0.002290 | 0.623720 |
| O12  | 0.876070  | 0.380720  | -0.001640 | O6B2   | 0.002780  | 0.498700  | 0.626080 |
| O13  | 0.626910  | 0.881860  | 0.505000  | O6B3   | -0.002840 | -0.002230 | 0.876290 |
| O14  | 0.625560  | 0.382800  | 0.505790  | O6B4   | 0.000680  | 0.498240  | 0.877400 |
| O21  | 0.876360  | 0.623530  | -0.000280 | FeA11  | 0.875090  | 0.751330  | 0.065377 |
| O22  | 0.876980  | 0.123780  | 0.000030  | FeA12  | 0.878140  | 0.252040  | 0.065046 |
| O23  | 0.623520  | 0.623300  | 0.503400  | FeA13  | 0.624750  | 0.752760  | 0.437877 |
| O24  | 0.625750  | 0.124740  | 0.501780  | FeA14  | 0.626600  | 0.253980  | 0.437830 |
| O31  | 0.877800  | 0.869660  | 0.252680  | FeA21  | 0.874607  | 0.504770  | 0.190290 |
| O32  | 0.874200  | 0.376020  | 0.255120  | FeA22  | 0.880722  | 0.000740  | 0.188506 |
| O33  | 0.629420  | 0.876910  | 0.245740  | FeA23  | 0.625263  | 0.501620  | 0.311090 |
| O34  | 0.624920  | 0.369800  | 0.245670  | FeA24  | 0.629229  | 0.005024  | 0.312775 |
| O41  | 0.877320  | 0.637490  | 0.254760  | FeB1A1 | 0.750570  | -0.002120 | 0.002273 |
| O42  | 0.878010  | 0.131690  | 0.251800  | FeB1A2 | 0.751160  | 0.498650  | 0.001114 |
| O43  | 0.629380  | 0.632160  | 0.246810  | FeB1B1 | 0.001870  | 0.500500  | 0.501700 |
| O44  | 0.627080  | 0.136800  | 0.249250  | FeB1B2 | -0.002570 | 0.000760  | 0.496931 |
| O5A1 | 0.743500  | 0.750500  | 0.130300  | FeB2A1 | 0.747580  | 0.756391  | 0.252602 |
| O5A2 | 0.748540  | 0.256440  | 0.130350  | FeB2A2 | 0.759290  | 0.252197  | 0.253673 |
| O5A3 | 0.752710  | 0.755180  | 0.372240  | FeB2B1 | 0.002550  | 0.743720  | 0.751877 |
| O5A4 | 0.755860  | 0.257370  | 0.374200  | FeB2B2 | 0.002140  | 0.245880  | 0.751910 |
| O5B1 | 0.010060  | 0.747930  | 0.629090  | FeB31  | 0.876940  | 0.879450  | 0.379805 |
| O5B2 | 0.005170  | 0.244900  | 0.630800  | FeB32  | 0.876440  | 0.387473  | 0.380749 |
| O5B3 | -0.005150 | 0.746410  | 0.872170  | FeB33  | 0.626630  | 0.886624  | 0.121776 |
| O5B4 | -0.002740 | 0.244390  | 0.871240  | FeB34  | 0.628780  | 0.374621  | 0.123112 |
| O6A1 | 0.743150  | 0.502750  | 0.125810  | FeB41  | 0.875990  | 0.624820  | 0.376706 |
| O6A2 | 0.751030  | -0.000400 | 0.124760  | FeB42  | 0.875430  | 0.130870  | 0.374365 |
| O6A3 | 0.752390  | 0.503270  | 0.376520  | FeB43  | 0.625660  | 0.627760  | 0.125840 |
| O6A4 | 0.759620  | 0.004770  | 0.376700  | FeB44  | 0.627880  | 0.126010  | 0.126517 |

## Section IV. Lattice structure and crystallographic sites of low-temperature phase

### $\text{Fe}_3\text{O}_4$

Figure S5 shows the distribution of different  $\text{Fe}_B$  sites in monoclinic unit cell. The equivalent  $\text{Fe}_B$  ions are marked with same color. It should be noted that the charge ordering occurs at  $\text{Fe}_B$  sites. So, only the  $\text{Fe}_B$  sites are colored for easy viewing.

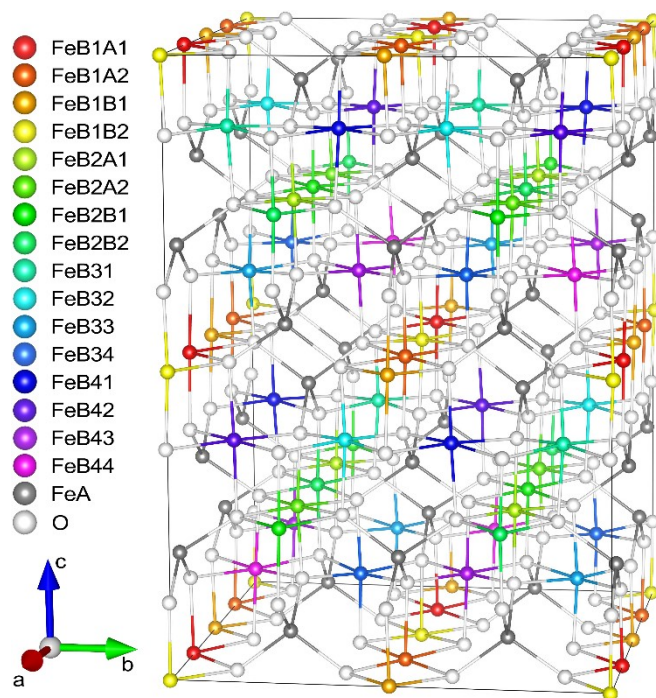

Fig. S5 Sketch map of monoclinic  $\text{Fe}_3\text{O}_4$ . The white and grey spheres represent O and  $\text{Fe}_A$  ions, respectively.  $\text{Fe}_B$  ions at different sites are marked with different colors.

## References

- 1 H. T. Jeng, G. Y. Guo, and D. J. Huang, Charge-orbital ordering in low-temperature structures of magnetite: GGA+ $U$  investigations, *Phys. Rev. B*, 2006, **74**, 195115.
- 2 M. S. Senn, J. P. Wright, and J. P. Attfield, Charge order and three-site distortions in the Verwey structure of magnetite, *Nature*, 2012, **481**, 173-176.
